# Supplementary material for: Heteromultivalent scaffolds fabricated by biomimetic co-assembly of DNA–RNA building blocks for the multi-analysis of miRNAs
Source: Royal Society of Chemistry journal article supplement (doi:10.1039/d2tb02663e), 2023-01-01
Supplement: d2tb02663e1.pdf [file d2tb02663e1.pdf]

## Supplementary Information

### **Heteromultivalent scaffolds fabricated by biomimetic co-assembly of DNA-RNA building blocks for the multi-analysis of miRNAs**

Chengjie Duan <sup>a</sup>, Yan Chen <sup>a</sup>, Zhiqiang Hou <sup>a</sup>, Dayong Li <sup>a</sup>, Jin Jiao <sup>c\*</sup>, Weihao Sun <sup>d\*</sup>, Yang Xiang

<sup>a, b\*</sup>

*<sup>a</sup>State Key Laboratory of Pharmaceutical Biotechnology, School of Life Sciences, Nanjing University, Nanjing 210023, P. R. China*

*<sup>b</sup>State Key Laboratory of Natural and Biomimetic Drugs, Peking University, Beijing 100191, P. R. China*

*<sup>c</sup>School of Life Sciences, Shandong First Medical University & Shandong Academy of Medical Sciences, Jinan, Shandong 250117, P. R. China.*

*<sup>d</sup>Department of Geriatric Gastroenterology, The First Affiliated Hospital of Nanjing Medical University, Nanjing, 210029, P. R. China*

---

\* Corresponding authors: xiangy@nju.edu.cn (Y. Xiang), swh@njmu.edu.cn (W. Sun), jiaojin@sdfmu.edu.cn (J. Jiao).

**Table S1.** Nucleic acids used in this study.

| Name               | Sequences (from 5' to 3')                                  |
|--------------------|------------------------------------------------------------|
| miR-342-3p (miR-1) | UCUCACACAGAAAUCGCACCCGU                                    |
| miR-18b-5p (miR-2) | UAAGGUGCAUCUAGUGCAGUUAG                                    |
| miR-30e-5p (miR-3) | UGUAAACAUCCUUGACUGGAAG                                     |
| miR-143-3p (miR-4) | UGAGAUGAAGCACUGUAGCUC                                      |
| Branch Linker-1    | TTCTGTGTGAGAAGATGCACCTTAACGGGTGCGAT                        |
| Branch Linker-2    | AGATGCACCTTATTCTGTGTGAGACTAACTGCACT                        |
| TAMRA modified     | TTCTGTGTGAGAAGATGCACCTTAACGGGTGCGAT-TAMRA                  |
| Branch Linker-1    |                                                            |
| FAM modified       | AGATGCACCTTATTCTGTGTGAGACTAACTGCACT-FAM                    |
| Branch Linker-2    |                                                            |
| M1 <sup>a</sup>    | UCUCACACA <span style="color: red;">AAA</span> UCGCACCCGU  |
| M2                 | UCUCACACA <span style="color: red;">AG</span> AUCGCACCCGU  |
| M3                 | UCUCACACA <span style="color: red;">AGG</span> AUCGCACCCGU |

<sup>a</sup>The mutant sequence of miR-342-3p, 1-3 represent the number of the mutant nucleotides. The mutant region is marked in red.

### Optimization of the experimental condition.

Since the FRET signal can be calculated by the ratio of the fluorescence intensity of the FRET donor and acceptor, the concentration ratio between the FRET donor, BL-1 and FRET acceptor BL-2 may have a significant influence on the FRET efficiency. Therefore, the ratio of BL-1/BL-2 have been optimized. As shown in Figure S1A, the  $F_A/F_D$  value increases with increasing ratio and reaches a plateau when the ratio approaches 2. Therefore, this ratio was selected as the optimized ratio for the next experiments. Then, the time for the hybridization of the dendrimer was optimized. The result (Figure S1B) shows a fast increase in the  $F_A/F_D$  value in the first hour and a slight change thereafter, which means that 1 hour of hybridization is enough for the effective analysis of the targets. Therefore, in the subsequent experiment, the hybridization time was set as 1 hour.

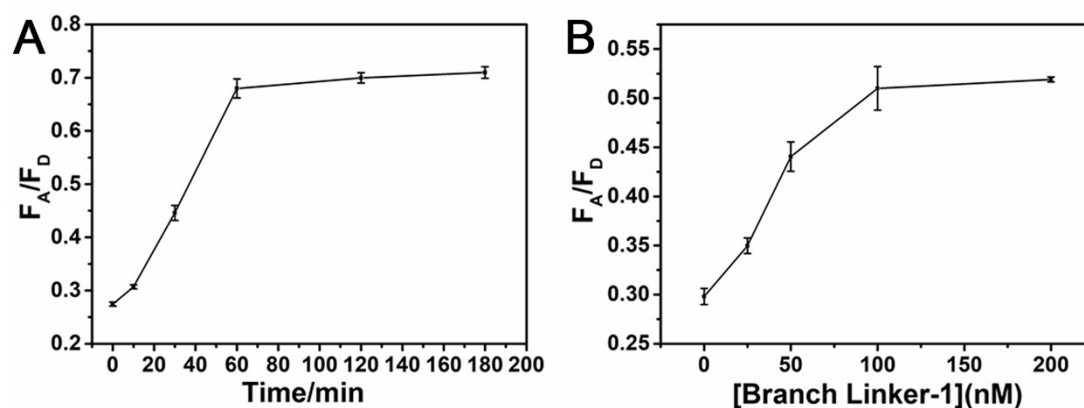

**Fig. S1** (A) Optimization of the hybridization time of the miRNAs and the Branch Linkers. The concentrations of miRNAs and Branch Linkers are 100 nM and 50 nM respectively. (B) Optimization of BL-1/BL-2 ratio. In all of the experiments, the concentrations of miRNAs are 75 nM. The concentration of BL-2 is 50 nM.

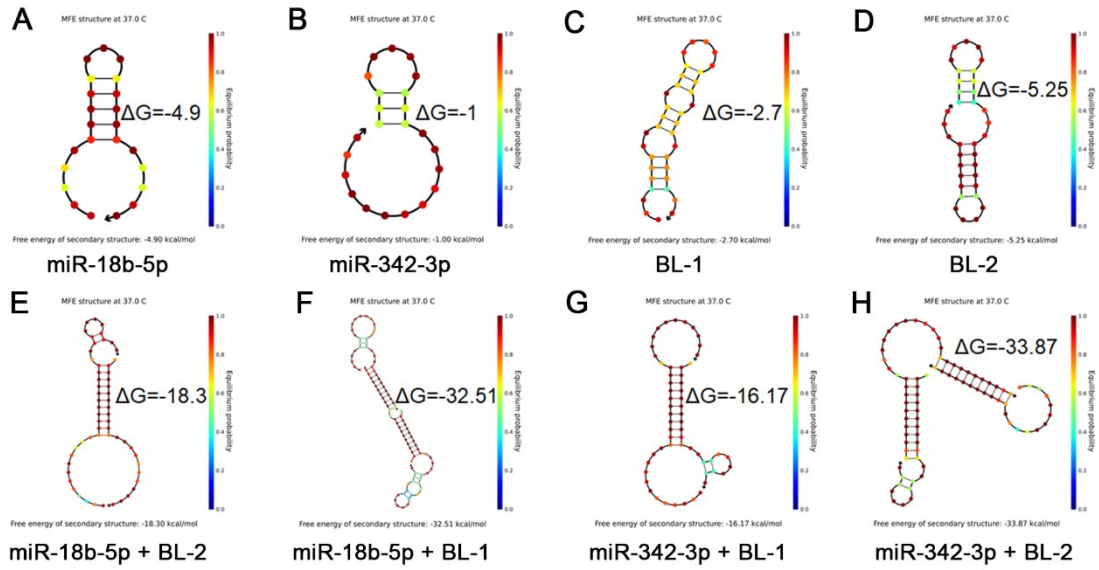

**Fig. S2** Predicted secondary structure of miR-18b-5p (A), miR-342-3p (B), BL-1 (C), BL-2 (D), hybridization product of miR-18b-5p and BL-2 (E), miR-18b-5p and BL-1 (F), miR-342-3p and BL-1 (G), miR-342-3p and BL-2 (H).

**Table S2.** The recovery tests of the proposed method.

| Sample | Kind of sample | Dose of spiked miRNA (nM) | Found (nM) | Recovery (%) | CV (% , n=3) |
|--------|----------------|---------------------------|------------|--------------|--------------|
| 1      | 10% serum      | 0.1                       | 0.098      | 98%          | 0.34%        |
| 2      | 10% serum      | 1                         | 1.103      | 110.3%       | 1.1%         |
| 3      | 10% serum      | 10                        | 8.945      | 89.45%       | 6.9%         |
| 4      | aCSF           | 0.1                       | 0.091      | 91%          | 0.25%        |
| 5      | aCSF           | 1                         | 0.852      | 85.2%        | 0.16%        |
| 6      | aCSF           | 10                        | 10.123     | 101.23       | 0.57%        |
